# Supplementary material for: Enhanced photon harvesting by embedding cost-effective polystyrene microspheres as light scatterers in the perovskite photodetector
Source: Royal Society of Chemistry journal article supplement (doi:10.1039/d1tc03211a), 2021-01-01
Supplement: d1tc03211a1.pdf [file d1tc03211a1.pdf]

## Electronic Supplementary Information

### **Enhanced photon harvesting by embedding cost-effective polystyrene microspheres as light scatterers in the perovskite photodetector**

Xinran Fu<sup>a</sup>, Qiyang Wang<sup>a</sup>, Jingtao Wang<sup>a</sup>, Zhijian Huang<sup>a</sup>, Xueqian Li<sup>a</sup>, Da Wen<sup>a</sup>, Junyu Fang<sup>a</sup>, Bobo Li<sup>a\*</sup>,  
Shuang Zhou<sup>a\*</sup> and Haixi Zhang<sup>b\*</sup>

a.College of New Materials and New Energies, Shenzhen Technology University, Shenzhen, Guangdong 518118, P. R. China. E-mail: libobo@sztu.edu.cn; zhoushuang@sztu.edu.cn

b.School of Science and Engineering, The Chinese University of Hong Kong, Shenzhen, Guangdong, 518172, P. R. China. E-mail: zhanghaixi@cuhk.edu.cn

**Figure S1** Energy flow diagram for the device without PS microspheres.

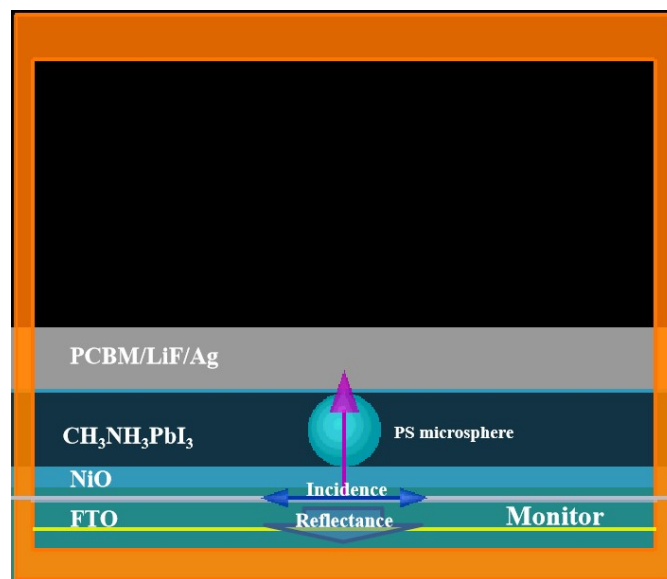

**Figure S2** The schematic diagram for simulation experiment in this work.

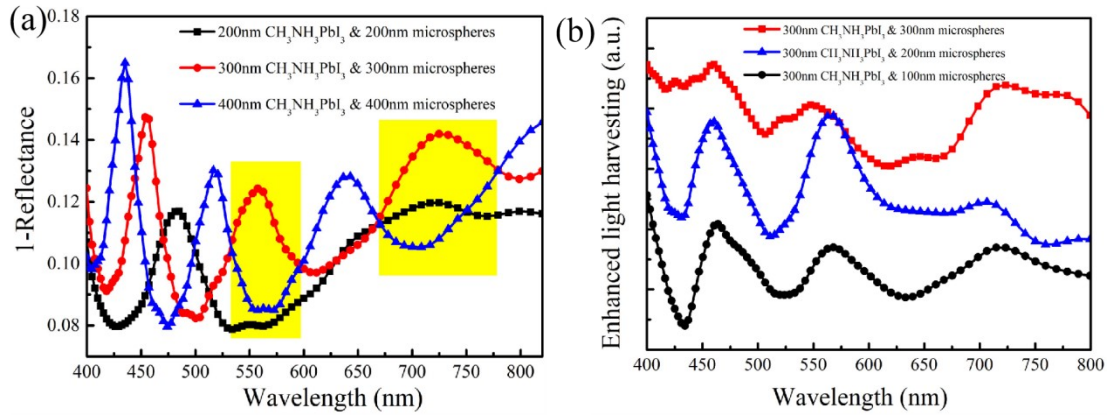

**Figure S3** The calculation results of (a) 1-reflectance and (b) enhanced light harvesting with embedded different sizes of microspheres in the  $\text{CH}_3\text{NH}_3\text{PbI}_3$  perovskite film.

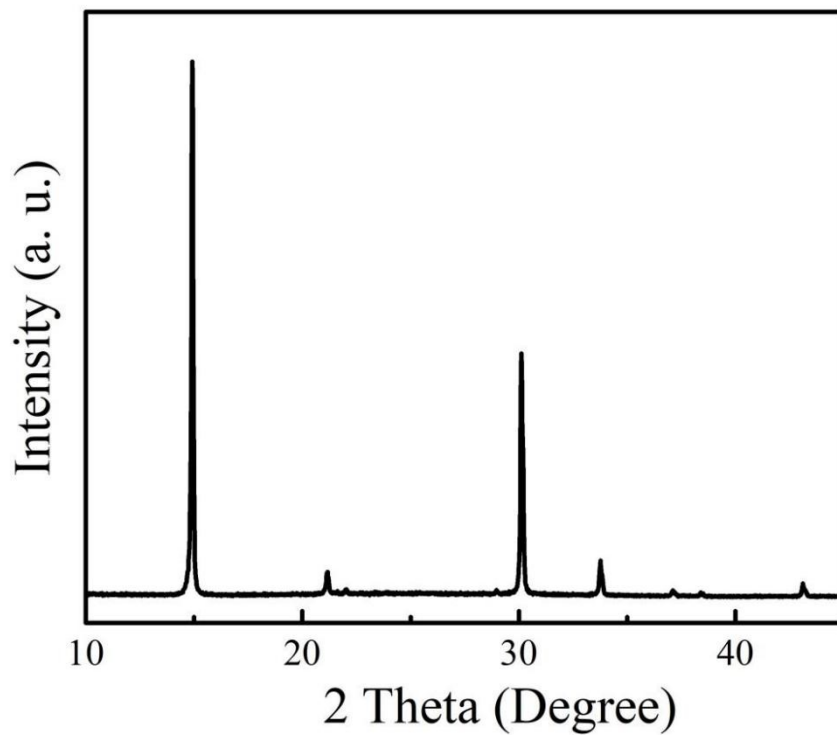

**Figure S4** The XRD pattern of the  $\text{CH}_3\text{NH}_3\text{PbI}_3$  perovskite film in this work.

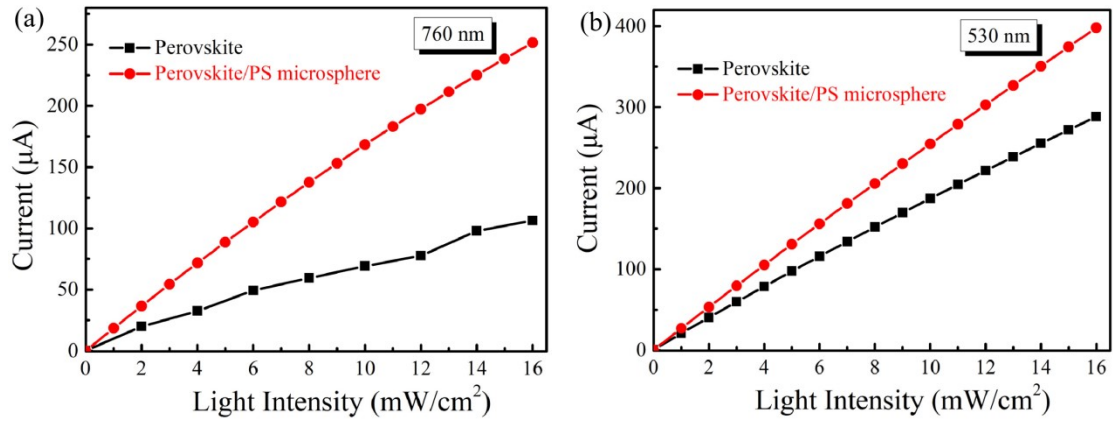

**Figure S5** Photocurrent of devices with and without PS microspheres under (a) 760 nm and (b) 530 nm light illumination (form 0 to 16  $\text{mW}/\text{cm}^2$ ).

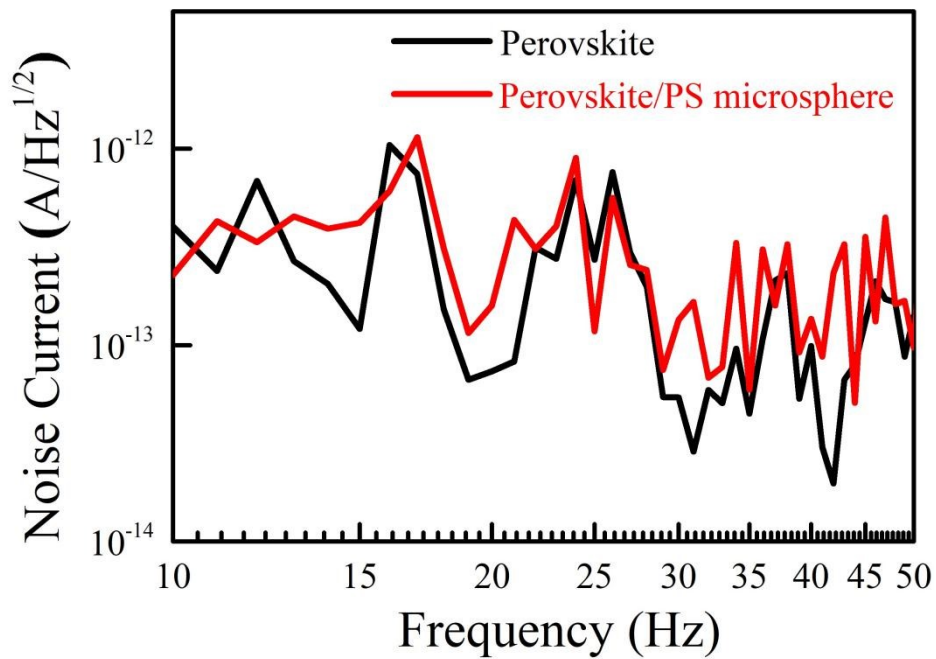

**Figure S6** The frequency dependence of the noise current for the perovskite devices.

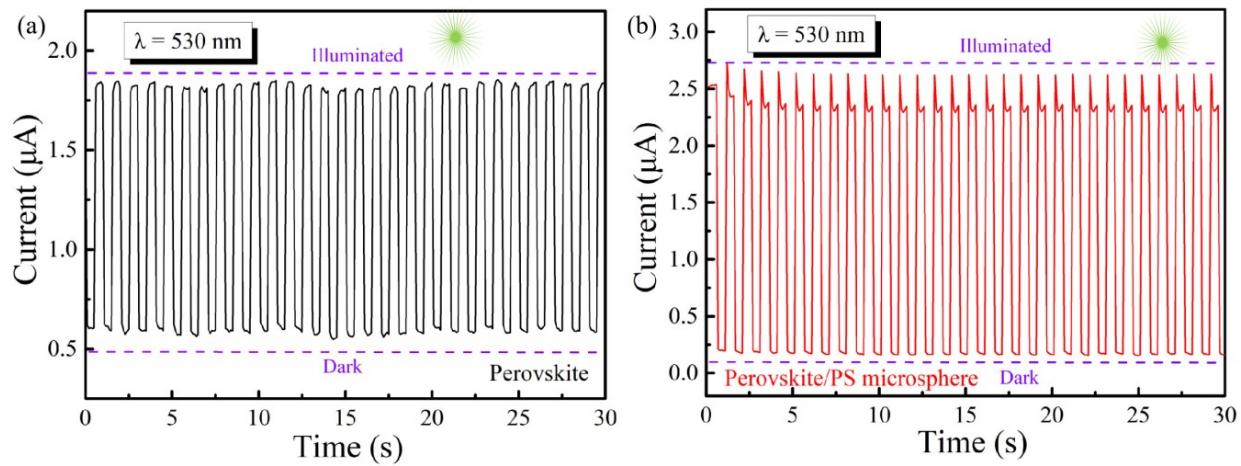

**Figure S7** Time-dependent response of PDs irradiated at 530 nm under light power intensity of 0.1 mW/cm<sup>2</sup>.
